# Supplementary material
Source: MDPI journal article supplement (https://www.mdpi.com/2076-3417/7/12/1226)
Supplement: s1 [file s1]

In Figure 3, this study analyzed the cooling properties of BOF slag that is used in asphalt mixtures, and evaluated BOF slag applications regarding the effectiveness of stabilization and ‘open to traffic’ time of different types of aggregate gradation asphalt mixtures. In addition, Figure 8-10 were showing the distribution of voids of different mixture and the thermal energy temperature. This indicates that the non-uniform distribution of the voids on dense mixture caused the cooling process to decrease the loading resistance.

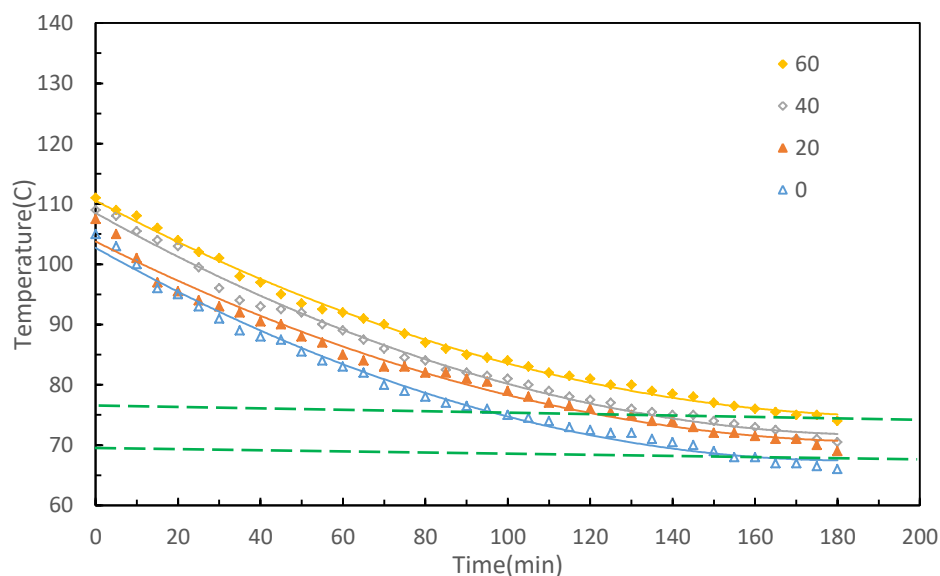

(a) Dense-graded mixture.

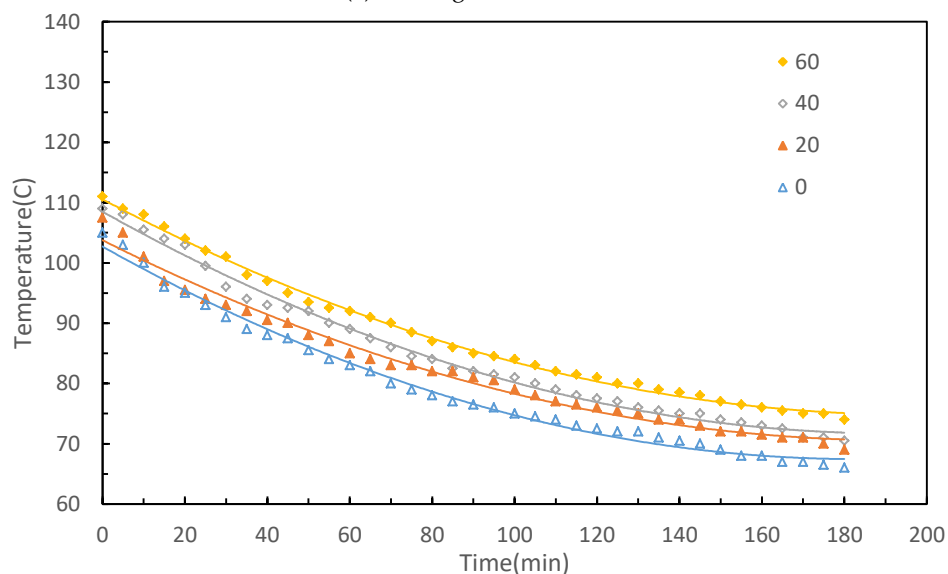

(b) SMA-graded mixture.

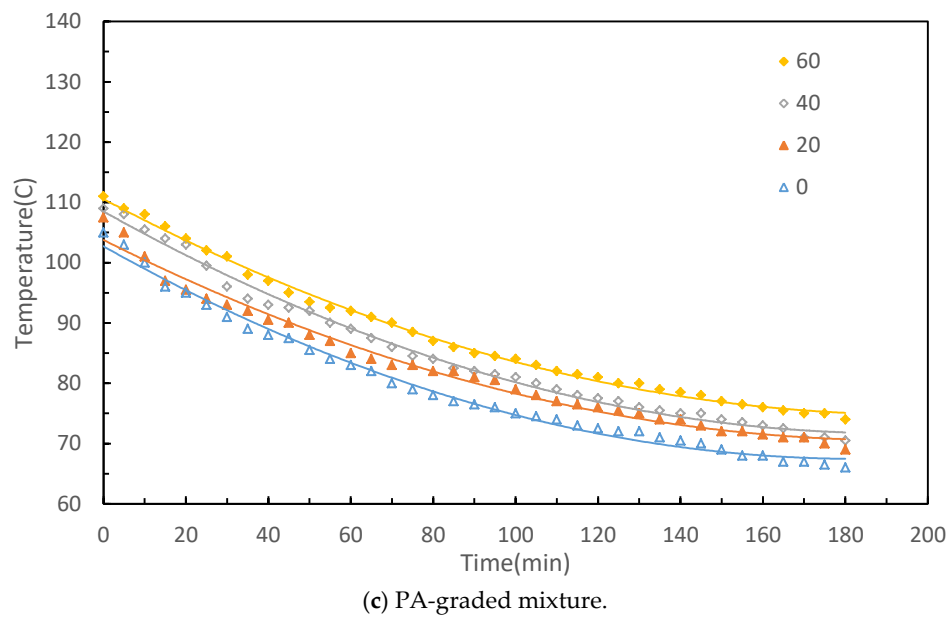

Figure 3. Temperature gradient variation diagram.

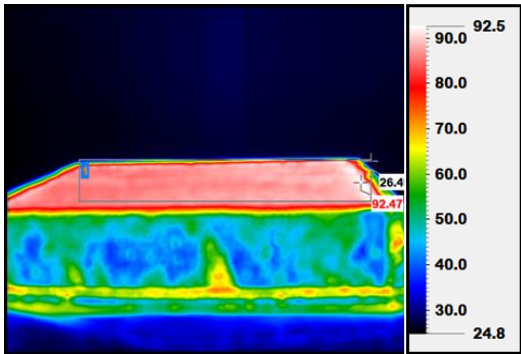

Figure 8. Dense-graded mixture thermal image (°C).

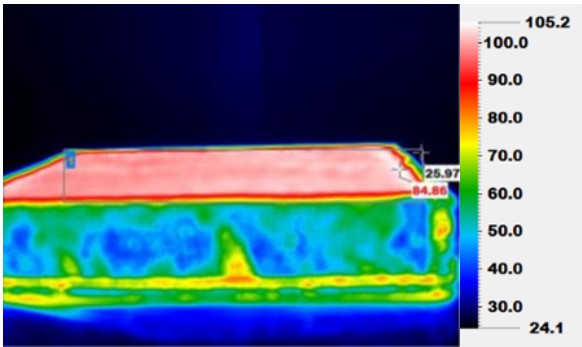

Figure 9. SMA-graded mixture thermal image (°C)

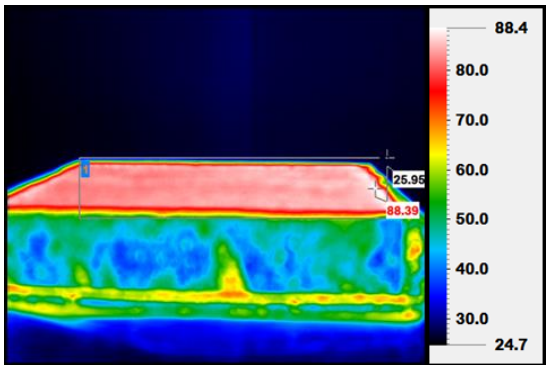

Figure 10. PA-graded mixture thermal image (°C)
